# Supplementary material
Source: MDPI journal article supplement (https://www.mdpi.com/2071-1050/14/21/14435)
Supplement: s1 [file s1]

## Supplementary data

**Table S1.** Outcome and the mediator model coefficients

| Outcome Model                    |                                  |            |                                  |                                  |            |
|----------------------------------|----------------------------------|------------|----------------------------------|----------------------------------|------------|
| Overall Sample                   | $\beta$ Coefficients (Std. Err.) | p- value   | Elderly Sample                   | $\beta$ Coefficients (Std. Err.) | p- value   |
| Thermal discomfort               | −0.050 (0.156)                   | ≤ 0.749    | Thermal discomfort               | −0.073 (0.212)                   | ≤ 0.731    |
| Energy affordability             | −0.430 (0.107)                   | ≤ 0.001*** | Energy Affordability             | −0.377 (0.142)                   | ≤ 0.008*** |
| Thermal discomfort#affordability | −0.197 (0.183)                   | ≤ 0.283    | Thermal discomfort#affordability | −0.265 (0.246)                   | ≤ 0.282    |
| Gender                           | 0.303 (0.086)                    | ≤ 0.001*** | Gender                           | 0.253 (0.116)                    | ≤ 0.029**  |
| Age range                        | 0.364 (0.046)                    | ≤ 0.001*** | Age range                        | -                                | -          |
| Marital status                   | 0.082 (0.037)                    | ≤ 0.027**  | Marital status                   | 0.120 (0.053)                    | ≤ 0.024**  |
| Birthplace                       | −0.070 (0.124)                   | ≤ 0.572    | Birthplace                       | −0.033 (0.209)                   | ≤ 0.875    |
| Education level                  | 0.047 (0.016)                    | ≤ 0.005**  | Education level                  | 0.0675 (0.020)                   | ≤ 0.001*** |
| Economic status                  | 0.098 (0.017)                    | ≤ 0.001*** | Economic status                  | 0.153 (0.044)                    | ≤ 0.001*** |
| Equivalized household size       | −0.010 (0.011)                   | ≤ 0.364    | Equivalized household size       | −0.027 (0.028)                   | ≤ 0.339    |
| Income                           | 0.047 (0.028)                    | ≤ 0.089*   | Income                           | 0.083 (0.035)                    | ≤ 0.018**  |
| Urbanization level               | 0.196 (0.052)                    | ≤ 0.001*** | Urbanization level               | 0.209 (0.069)                    | ≤ 0.002*** |
| Tenure status                    | −0.005 (0.032)                   | ≤ 0.863    | Tenure status                    | 0.014 (0.043)                    | ≤ 0.739    |
| House type                       | −0.155 (0.044)                   | ≤ 0.001*** | House type                       | −0.171 (0.059)                   | ≤ 0.004*** |
| House surface                    | −0.007 (0.001)                   | ≤ 0.001*** | House surface                    | −0.007 (0.001)                   | ≤ 0.001*** |
| Daylight                         | −0.127 (0.119)                   | ≤ 0.289    | Daylight                         | −0.081 (0.160)                   | ≤ 0.611    |
| Damp                             | 0.302 (0.091)                    | ≤ 0.001*** | Damp                             | 0.220 (0.124)                    | ≤ 0.075*   |
| Heating facilities               | −0.111 (0.050)                   | ≤ 0.030**  | Heating facilities               | −0.100 (0.069)                   | ≤ 0.145    |
| Cool during summer               | −0.047 (0.087)                   | ≤ 0.585    | Cool during summer               | −0.065 (0.116)                   | ≤ 0.575    |
| Chronic condition                | −2.851 (0.105)                   | ≤ 0.001*** | Chronic condition                | −2.51408 (0.136)                 | ≤ 0.001*** |

| Mediator Model                                                                                                                                                               |                                  |                    |                            |                                  |                    |
|------------------------------------------------------------------------------------------------------------------------------------------------------------------------------|----------------------------------|--------------------|----------------------------|----------------------------------|--------------------|
| Overall Sample                                                                                                                                                               | $\beta$ Coefficients (Std. Err.) | p- value           | Elderly Sample             | $\beta$ Coefficients (Std. Err.) | p- value           |
| Thermal discomfort                                                                                                                                                           | 1.463 (0.070)                    | $\leq 0.001^{***}$ | Thermal discomfort         | 1.600 (0.111)                    | $\leq 0.001^{***}$ |
| Gender                                                                                                                                                                       | -0.127 (0.069)                   | $\leq 0.065^*$     | Gender                     | -0.211 (0.116)                   | $\leq 0.068^*$     |
| Age range                                                                                                                                                                    | -0.020 (0.029)                   | $\leq 0.489$       | Age range                  | -                                | -                  |
| Marital status                                                                                                                                                               | -0.048 (0.030)                   | $\leq 0.110$       | Marital status             | -0.056 (0.053)                   | $\leq 0.285$       |
| Birthplace                                                                                                                                                                   | -0.008 (0.081)                   | $\leq 0.922$       | Birthplace                 | 0.374 (0.219)                    | $\leq 0.088^*$     |
| Education level                                                                                                                                                              | -0.005 (0.015)                   | $\leq 0.710$       | Education level            | -0.036 (0.019)                   | $\leq 0.059^*$     |
| Economic status                                                                                                                                                              | -0.062 (0.013)                   | $\leq 0.001^{***}$ | Economic status            | -0.022 (0.039)                   | $\leq 0.567$       |
| Equivalized household size                                                                                                                                                   | -0.020 (0.008)                   | $\leq 0.018^{**}$  | Equivalized household size | -0.070 (0.027)                   | $\leq 0.010^{**}$  |
| Income                                                                                                                                                                       | -0.067 (0.023)                   | $\leq 0.004^{***}$ | Income                     | -0.059 (0.035)                   | $\leq 0.091^*$     |
| Urbanization level                                                                                                                                                           | -0.090 (0.043)                   | $\leq 0.037^{**}$  | Urbanization level         | -0.153 (0.069)                   | $\leq 0.026^{**}$  |
| Tenure status                                                                                                                                                                | -0.078 (0.027)                   | $\leq 0.004^{**}$  | Tenure status              | -0.097 (0.041)                   | $\leq 0.019$       |
| House type                                                                                                                                                                   | 0.222 (0.036)                    | $\leq 0.001^{***}$ | House type                 | 0.280 (0.060)                    | $\leq 0.001^{***}$ |
| House surface                                                                                                                                                                | 0.003 (0.001)                    | $\leq 0.001^{***}$ | House surface              | 0.0004 (0.001)                   | $\leq 0.756$       |
| Daylight                                                                                                                                                                     | 0.287 (0.097)                    | $\leq 0.003^{**}$  | Daylight                   | 0.268 (0.154)                    | $\leq 0.082^*$     |
| Damp                                                                                                                                                                         | -0.268 (0.075)                   | $\leq 0.001^{***}$ | Damp                       | -0.446 (0.117)                   | $\leq 0.001^{***}$ |
| Heating facilities                                                                                                                                                           | -0.533 (0.042)                   | $\leq 0.001^{***}$ | Heating facilities         | -0.460 (0.070)                   | $\leq 0.001^{***}$ |
| Cool during summer                                                                                                                                                           | 0.317 (0.069)                    | $\leq 0.001^{***}$ | Cool during summer         | 0.308 (0.109)                    | $\leq 0.005^{***}$ |
| Chronic condition                                                                                                                                                            | 0.152 (0.070)                    | $\leq 0.030^{**}$  | Chronic condition          | 0.226 (0.109)                    | $\leq 0.039^{**}$  |
| ***, statical significance at the 1% level; **, statical significance at the 5% level; *, statical significance at the 10% level.<br>Robust standard errors in parentnesses. |                                  |                    |                            |                                  |                    |
